# Supplementary material
Source: Springer Nature journal article supplement (https://www.springermedizin.de/resource/supplementary/13054_2011_539_MOESM2_ESM.pdf/9708726)

# APACHE II- score > 25

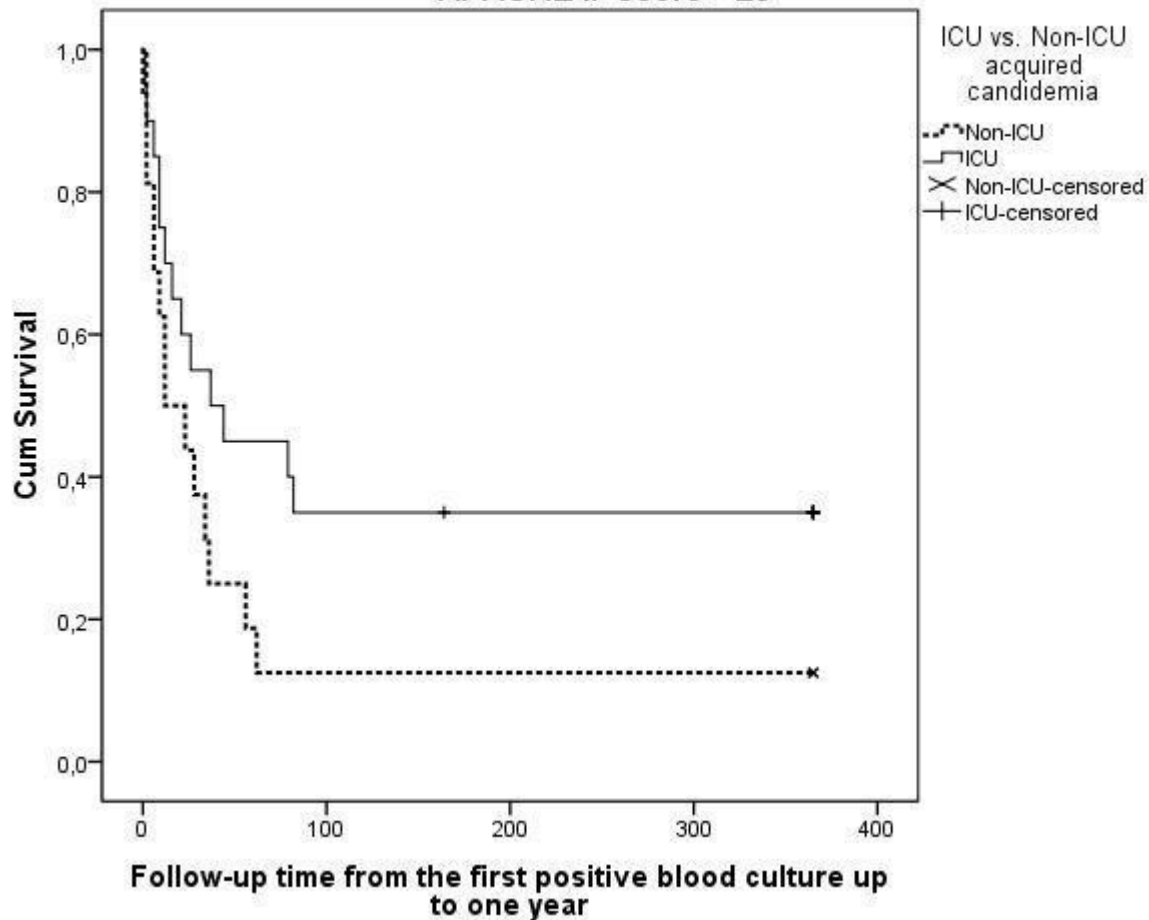

Supplement: MOESM2 [file 9708726]
